# Supplementary material for: Targeting Beta-Blocker Drug–Drug Interactions with Fibrinogen Blood Plasma Protein: A Computational and Experimental Study
Source: PubMed Central journal article supplement (PMC7699576; doi:10.3390/molecules25225425), 2020-11-19
Supplement: molecules-25-05425-s001.pdf [file molecules-25-05425-s001.pdf]

# Targeting beta-blocker drug-drug interactions with fibrinogen blood plasma protein: A computational and experimental study

Michael González-Durruthy <sup>1,2,\*</sup>, Riccardo Concu <sup>1</sup>, Laura F. Osmari Vendrame <sup>3</sup>, Ivana Zanella <sup>3</sup>, Juan M. Ruso <sup>2</sup> and M. Natália D.S. Cordeiro <sup>1,\*</sup>

<sup>1</sup> LAQV-REQUIMTE, Department of Chemistry and Biochemistry, Faculty of Sciences, University of Porto, 4169-007 Porto, Portugal; riccardo.concu@fc.up.pt

<sup>2</sup> Soft Matter and Molecular Biophysics Group, Department of Applied Physics, University of Santiago de Compostela, 15782 Santiago de Compostela, Spain; juanm.ruso@usc.es

<sup>3</sup> Post-Graduate Program in Nanoscience, Franciscana University (UFN), 97010-032 Santa Maria, RS, Brazil; laura.o.vendrame@gmail.com (L.F.O.V.); ivanazanella@gmail.com (I.Z.)

\* Correspondence: michael.durruthy@fc.up.pt (M.G.-D.); ncordeir@fc.up.pt (M.N.D.S.C.); Tel.: +351-220402502 (M.N.D.S.C.)

Academic Editor: Micholas Dean Smith

Received: 16 October 2020; Accepted: 17 November 2020; Published: 19 November 2020

## Table of contents

**Figure S1.** Prediction of the worst catalytic binding site of fibrinogen E-region.

**Figure S2.** Cartoon representation of beta-blocker interactions in the worst catalytic binding site of fibrinogen E-region.

**Figure S3.** Graphical breakdown of the different binding energy contributions of beta-blocker interactions in the worst catalytic binding site of fibrinogen E-region.

**Figure S4.** Representation of the *per* atom energy contributions of beta-blocker interactions in the worst catalytic binding site of fibrinogen E-region.

**Figure S5.** Druggability-depth-maximum solvent accessibility relationship of the critical target-residues of fibrinogen E-region binding sites (sites 1, 2, and 3).

**Figure S6.** Critical aggregation concentrations.

**Figure S7.** Graphical representation of the apparent molal compressibility ( $K_\phi$ ) *vs.* total concentration.

**Figure S8.** van der Waals surface representation of the predicted fibrinogen E-region binding sites with the corresponding tunnels.

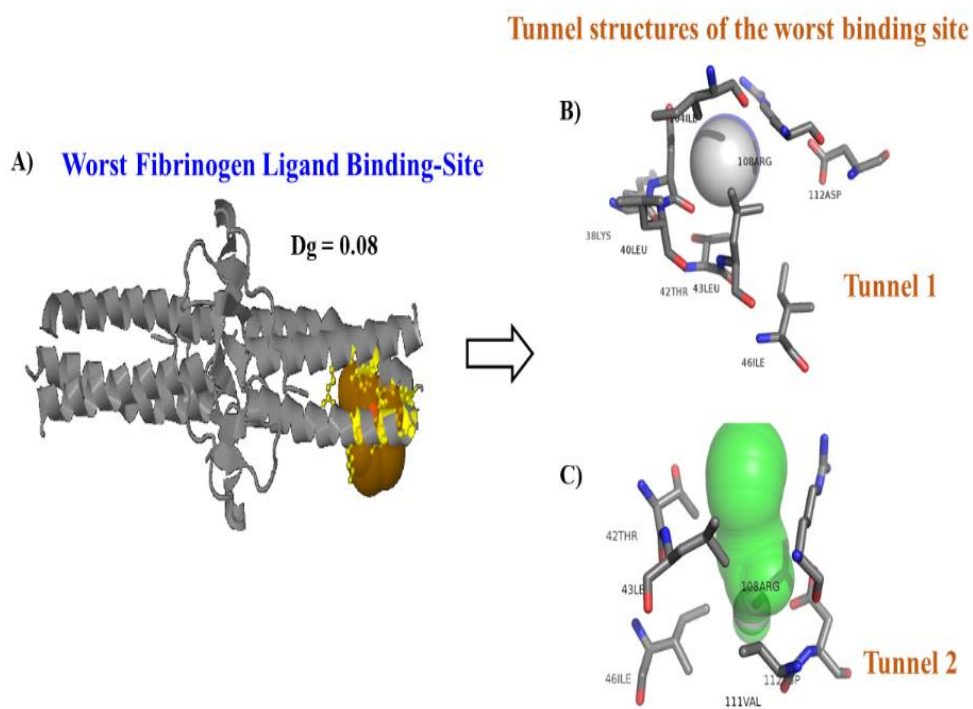

**Figure S1.** (A) Prediction of the worst catalytic binding site of fibrinogen E-region based on the druggability degree ( $D_g = 0.08$ ). (B) and (C) Tunnel structures of the worst binding site of fibrinogen E-region, namely of tunnel 1 (gray) and of tunnel 2 (green) with the surrounding catalytic residues.

**Acebutolol + Propranolol/Worst Fibrinogen Site**

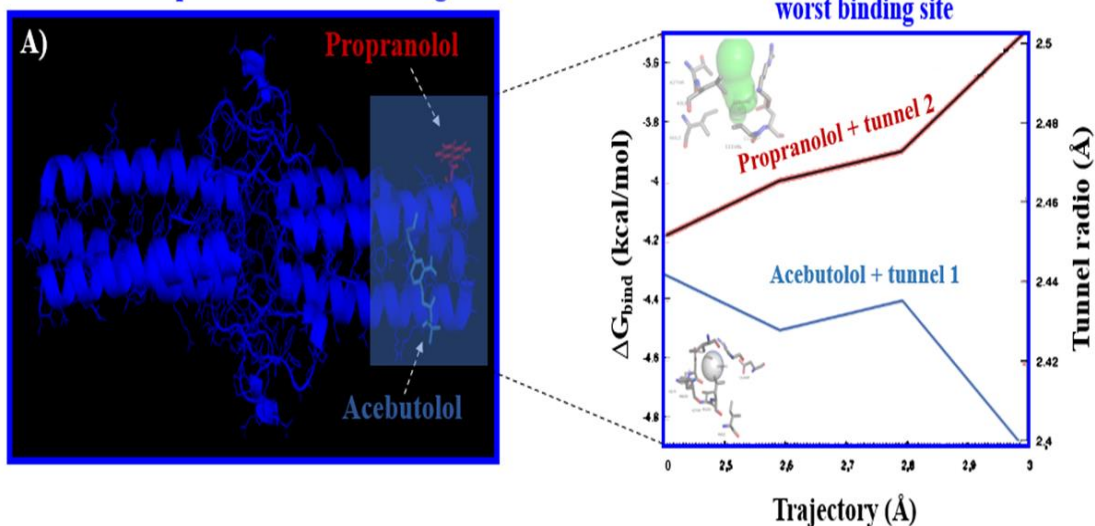

**Figure S2.** (A) Cartoon representation of beta-blocker interactions of acebutolol in tunnel 1 (blue) and propranolol in tunnel 2 (red) for the worst fibrinogen binding site ( $D_g = 0.08$ ). (B) Binding profiles of beta-blocker trajectories showing the total absence of beta-blocker drug-drug interactions based on the non-interception between beta-blocker trajectories.

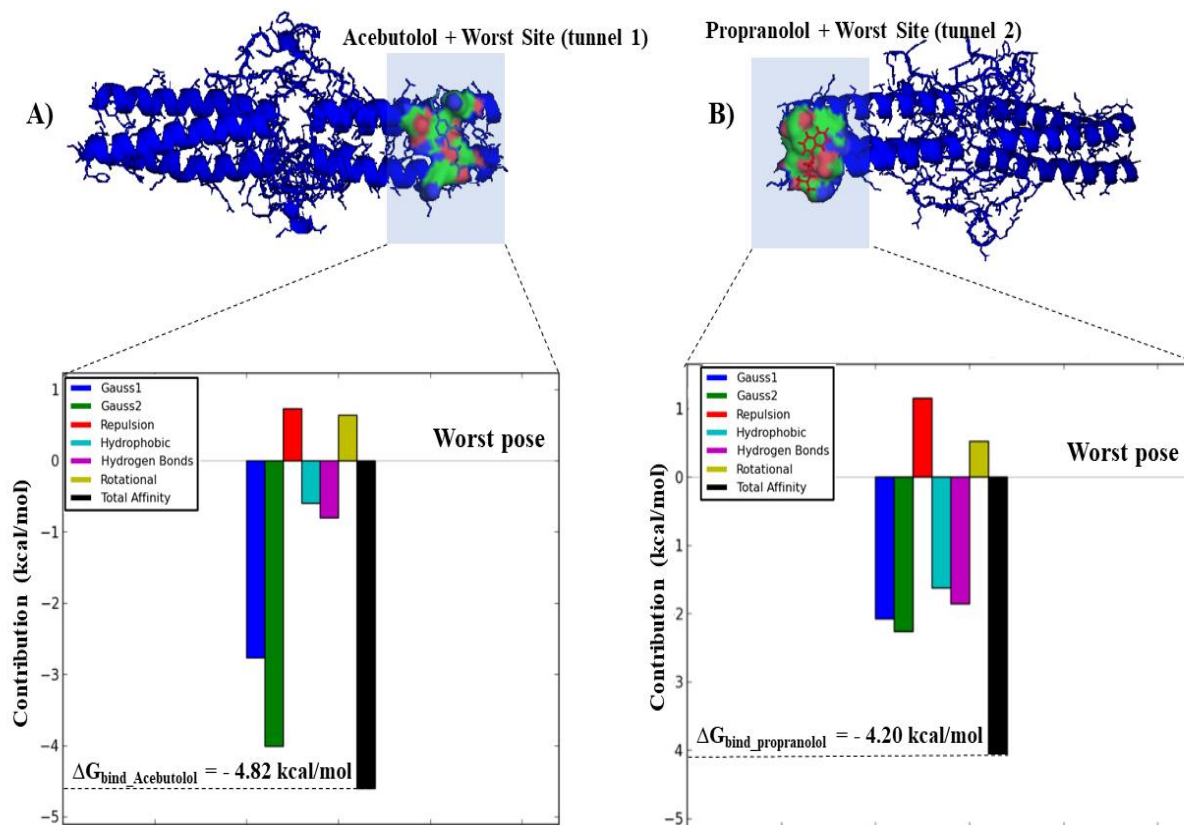

**Figure S3.** Graphical breakdown of the different binding energy contributions ( $\Delta G_{\text{Gauss1}}$ ,  $\Delta G_{\text{Gauss2}}$ ,  $\Delta G_{\text{repulsion}}$ ,  $\Delta G_{\text{H-bond}}$ ,  $\Delta G_{\text{hydrophobic}}$ , and  $\Delta G_{\text{rotational}}$ ) to the individual binding affinity ( $\Delta G_{\text{bind}}$ , kcal/mol) of the beta-blockers in the worst fibrinogen binding site ( $D_g = 0.08$ ). (A) Acebutolol, (B) Propranolol.

**A) Acebutolol + Worst Site (tunnel 1)**

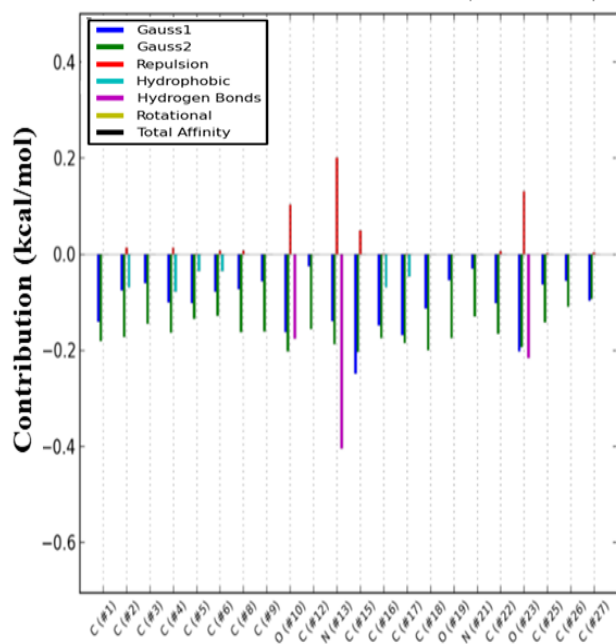

**B) Propranolol + Worst Site (tunnel 2)**

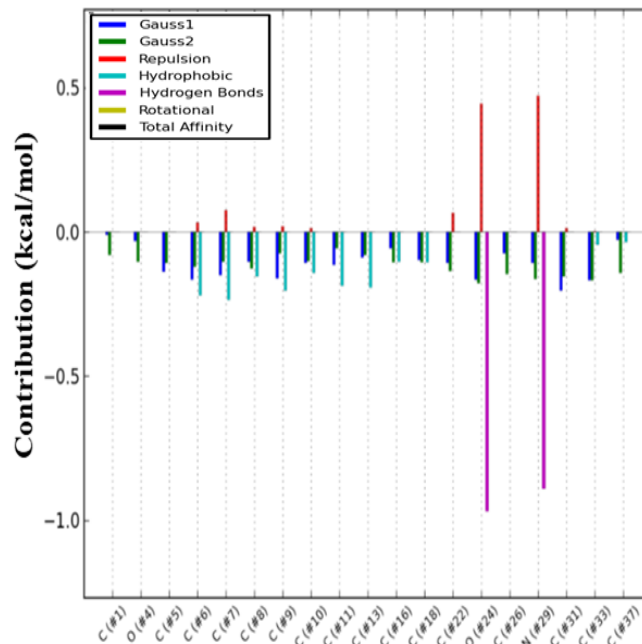

**Figure S4.** Representation of the *per* atom energy contributions (kcal/mol) to the individual binding affinity ( $\Delta G_{\text{bind}}$ ) of the beta-blockers in the worst fibrinogen binding site ( $D_g = 0.08$ ). (A) Acebutolol, (B) Propranolol.

### Druggability-Depth-Maximum Solvent Accessibility-Relationship of the Critical Target-Residues

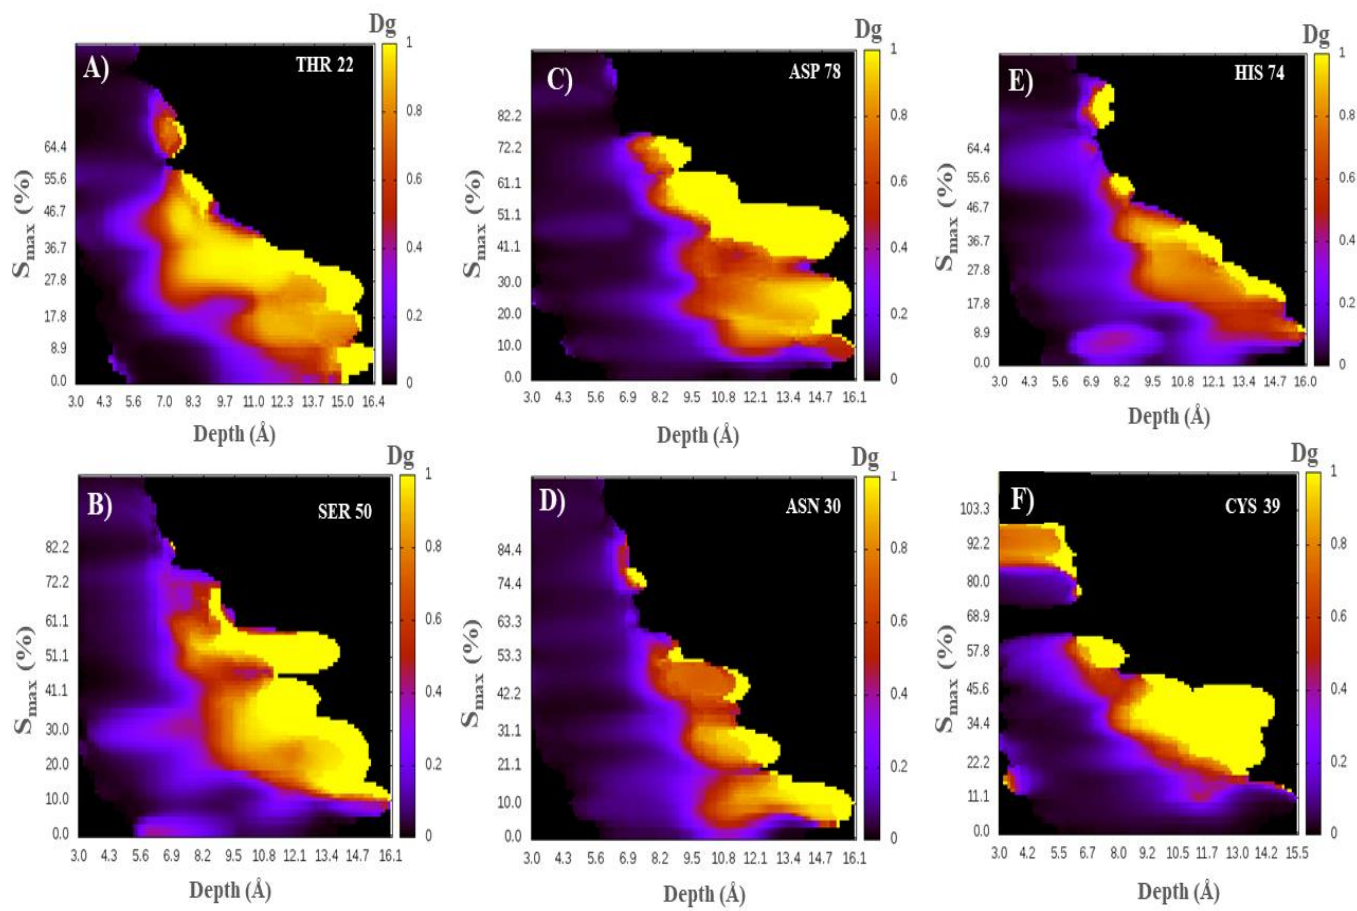

**Figure S5.** Druggability-depth-maximum solvent accessibility-relationship of the critical target-residues belonging to fibrinogen E-region binding sites (sites 1, 2, and 3). (A) TRH22, (B) SER50, (C) ASP78, (D) ASN30, (E) HIS74, (F) CYS39.

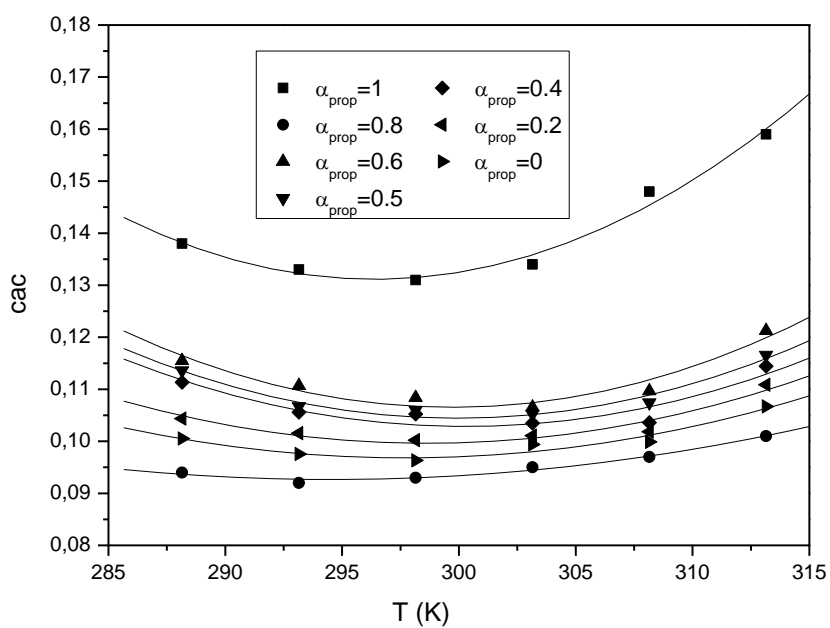

**Figure S6.** Critical aggregation concentrations (cac) as a function of propranolol concentration ratios ( $\alpha_{prop}$ ) obtained at different temperatures.

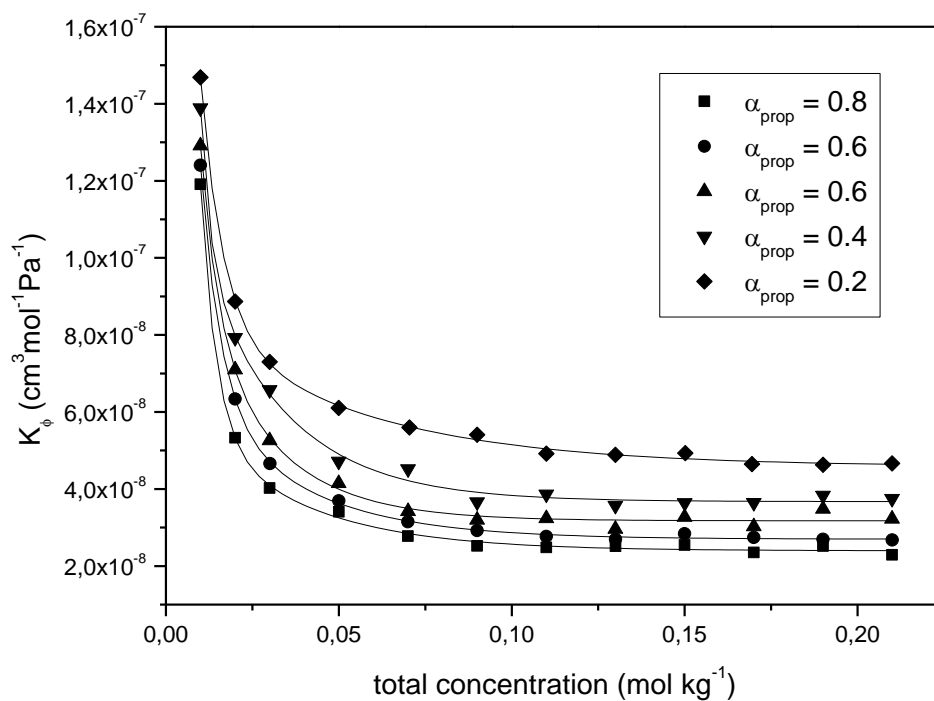

**Figure S7.** Graphical representation of the relationship between the apparent molal compressibility ( $K_\phi$ ) vs. total concentration at different propranolol concentration ratios ( $\alpha_{prop}$ ).

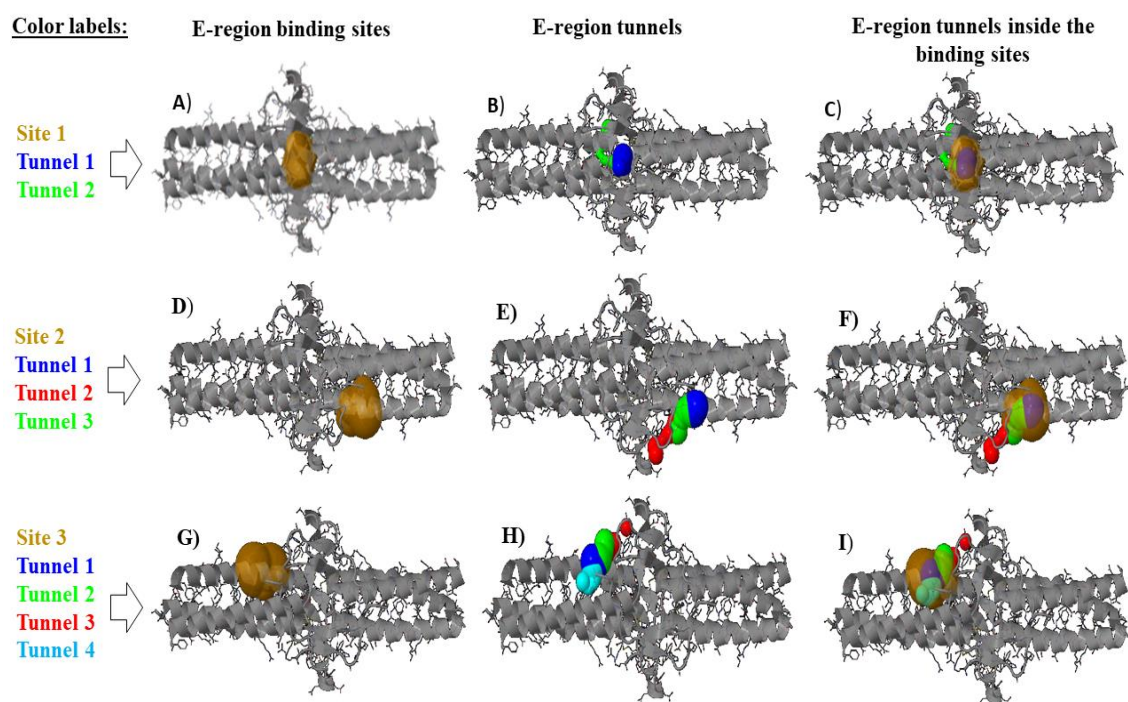

**Figure S8.** In the top, panels from (A) to (C) relate to the van der Waals surface representation of the predicted fibrinogen E-region binding site 1 with the corresponding tunnels (tunnels 1 and 2). In the middle, panels from (D) to (F) relate to the van der Waals surface representation of the predicted fibrinogen E-region binding site 2 with the corresponding tunnels (tunnels 1, 2 and 3). In the bottom, panels (G) to (I) relate to the van der Waals surface representation of the predicted fibrinogen E-region binding site 3 with the corresponding tunnels (tunnels 1, 2, 3 and 4). Binding sites are depicted as a transparent orange shadow region and the remaining colors correspond to the tunnels in all the cases.
